# Supplementary material for: Chinese herbal medicine treats COVID-19 by promoting self-healing power and balancing immune response: A functional classification analysis integrating molecular targets and pathways
Source: Research Square preprint supplement (doi:10.21203/rs.3.rs-8693251/v1), 2026-02-10
Supplement: Supplementary file 1 [file 6c59575099b5482451ea4444.docx]

**Supplemental data:**

**Supplemental Figure 1. The bar charts of functional classification for CHM herbs.**

Comparison of six representative formulas—LHQW, QFPD, JHQG, SFJD, XFBD, and HSBD—and their overall herb distribution based on functional categories (PSH, BIR, IV and their combinations). The numbers indicate the count of the specific herbs within each functional category.

**Supplemental Figure 2. The bar charts of functional classification for the molecular targets of CHM herbs.**

Functional distribution of molecular targets associated with the six formulas, classified as promoting self-healing, regulating immune response, inhibiting virus, and their combinations. The numbers indicate the count of specific molecular targets within each functional category.
